# Supplementary material for: Ru–Fe alloy mediated α-Fe2O3 particles on mesoporous carbon nanofibers as electrode materials with superior capacitive performance
Source: Royal Society of Chemistry journal article supplement (doi:10.1039/c6ra27324f), 2017-01-01
Supplement: c6ra27324f1.pdf [file c6ra27324f1.pdf]

Supporting Information for

**Ru-Fe alloy mediated  $\alpha$ -Fe<sub>2</sub>O<sub>3</sub> particles on mesoporous carbon nanofibers as  
electrode materials with superior capacitive performance**

Ying Yang,\* Feng Yang, Cheng-Jun Sun, Hairui Zhao, Shijie Hao, Dennis E. Brown,

Jiao Zhang, Yang Ren

**Corresponding author**

Email address: [catalyticsscience@163.com](mailto:catalyticsscience@163.com)

**Table S1** Metal content of RuFe@Fe<sub>2</sub>O<sub>3</sub>/mCNF composites

| Materials                                     | Ru/Fe<br>feed<br>ratio | Ru<br>content <sup>a</sup><br>(mmol<br>g <sup>-1</sup> ) | Fe<br>content <sup>a</sup><br>(mmol<br>g <sup>-1</sup> ) | Ru/Fe<br>molar<br>ratio | Total<br>metal<br>content<br>(mmol g <sup>-1</sup> ) | Ru/(Ru+Fe)<br>molar ratio |
|-----------------------------------------------|------------------------|----------------------------------------------------------|----------------------------------------------------------|-------------------------|------------------------------------------------------|---------------------------|
| RuFe@Fe <sub>2</sub> O <sub>3</sub> /mCNF-11% | 0.43                   | 1.78                                                     | 14.80                                                    | 0.12                    | 16.58                                                | 0.11                      |
| RuFe@Fe <sub>2</sub> O <sub>3</sub> /mCNF-25% | 1.00                   | 2.10                                                     | 6.25                                                     | 0.34                    | 8.35                                                 | 0.25                      |
| RuFe@Fe <sub>2</sub> O <sub>3</sub> /mCNF-40% | 9.00                   | 2.87                                                     | 4.28                                                     | 0.67                    | 7.15                                                 | 0.40                      |

<sup>a</sup> Estimated by ICP-AES.

The electrochemical gravimetric specific capacitance of the electrode material based on GCD curves was determined as follows:

$$C_n = \frac{C}{m} = \frac{I \times \Delta t}{m \times \Delta V}$$

in which  $C_n$  is the gravimetric specific capacitance (F g<sup>-1</sup>),  $C$  is the capacitance (F),  $m$  is the mass of electrode material (g),  $I$  is the charge-discharge current (A),  $\Delta t$  is the discharge time (s), and  $\Delta V$  is the potential window of charge-discharge (V).

**Table S2** List of specific capacitance of RuFe@Fe<sub>2</sub>O<sub>3</sub>/mCNF-25% at various current densities

| Current density<br>(A g <sup>-1</sup> ) | Specific capacitance<br>(F g <sup>-1</sup> ) |
|-----------------------------------------|----------------------------------------------|
| 0.25                                    | 343                                          |
| 0.50                                    | 296                                          |
| 1.00                                    | 276                                          |
| 2.00                                    | 265                                          |

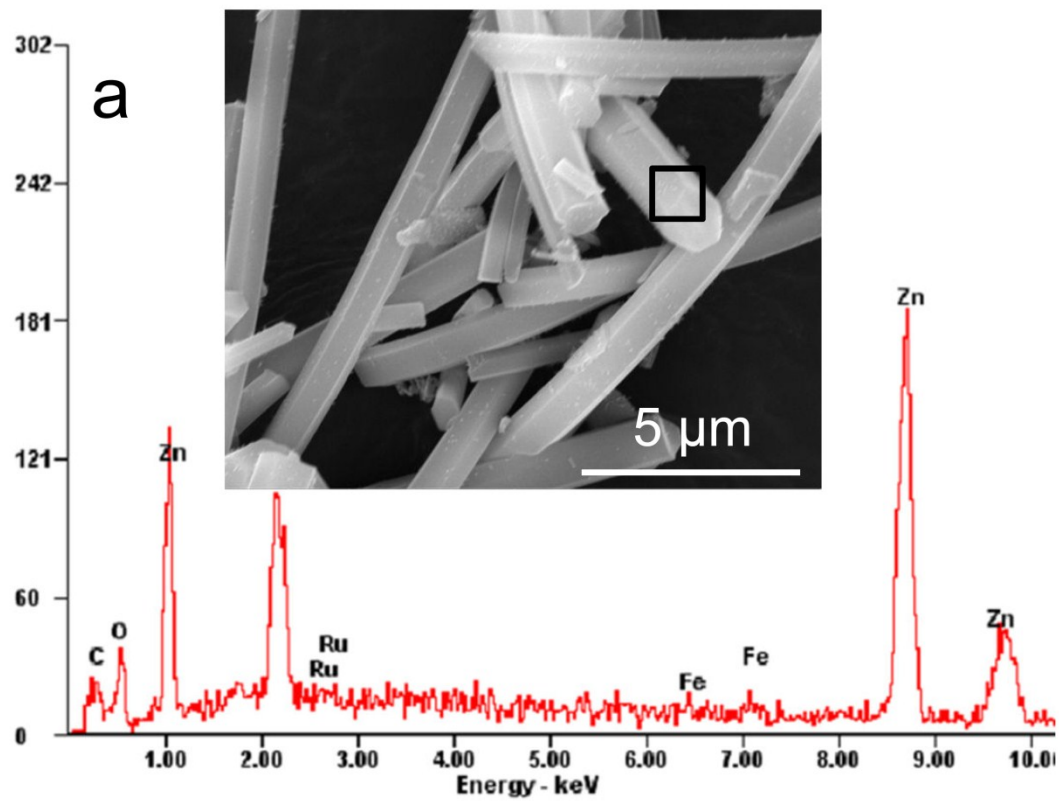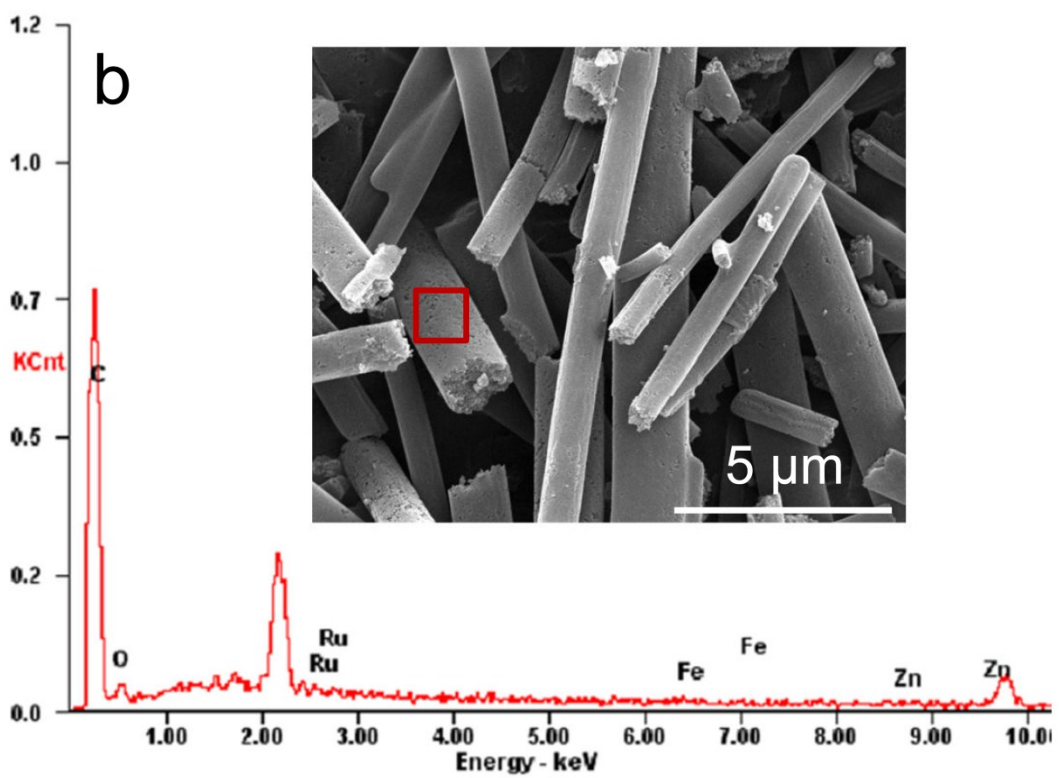

**Fig. S1.** EDS analysis of (a)  $\text{Ru}_5\text{Fe}_5\text{-ZnBTC}$  and (b)  $\text{RuFe@Fe}_2\text{O}_3/\text{mCNF-25\%}$ .

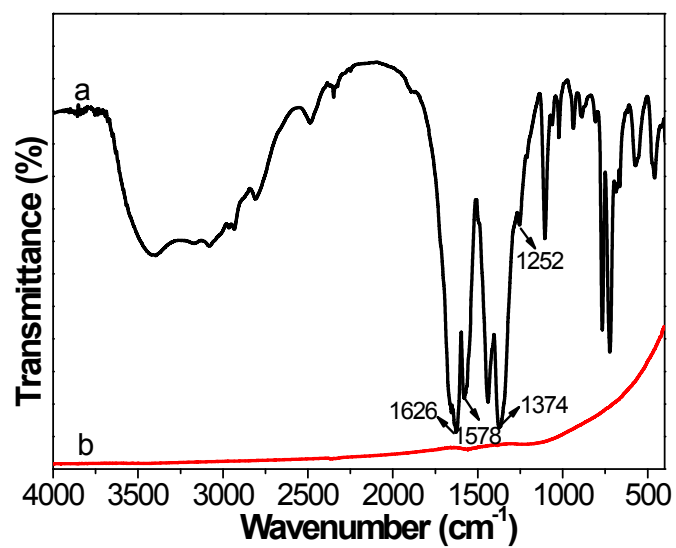

**Fig. S2.** FT-IR spectra of (a)  $\text{Ru}_5\text{Fe}_5\text{-ZnBTC}$  and (b)  $\text{RuFe@Fe}_2\text{O}_3/\text{mCNF-25\%}$ .

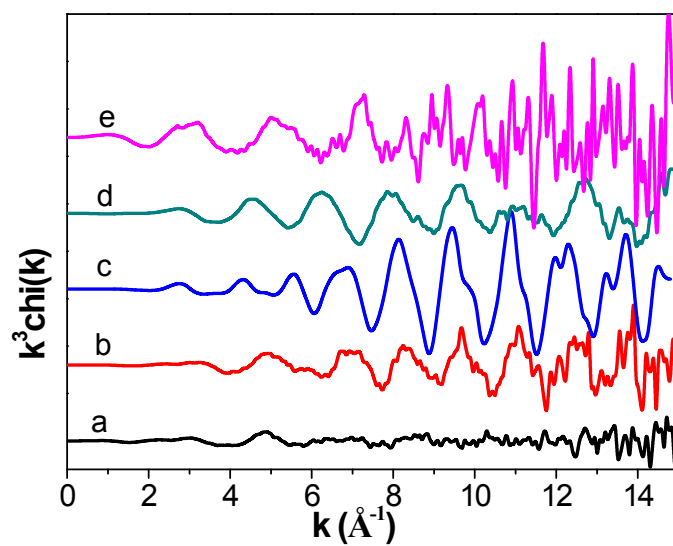

**Fig. S3.** Normalized EXAFS Ru K-edge scan plotted as  $k^3\chi(k)$  vs  $k$  for (a)  $\text{Ru}_5\text{Fe}_5\text{-ZnBTC}$ , (b)  $\text{RuFe@Fe}_2\text{O}_3/\text{mCNF-25\%}$ , (c) Ru foil, (d)  $\text{RuCl}_3$  and (e)  $\text{RuO}_2$ .

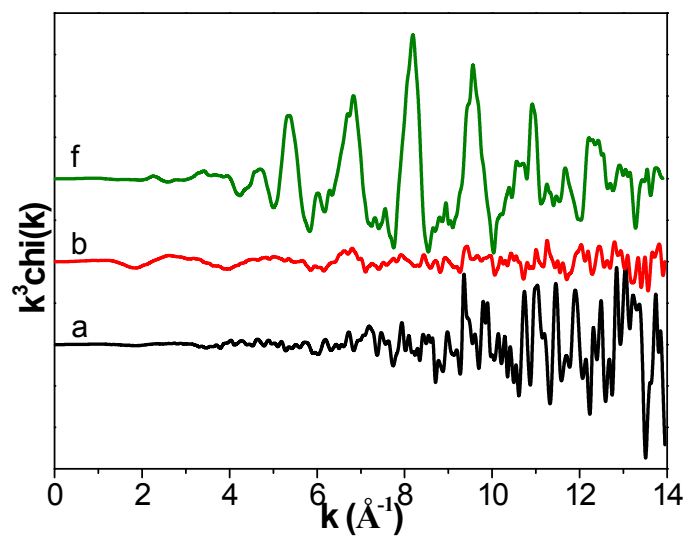

**Fig. S4.** Normalized EXAFS Fe K-edge scan plotted as  $k^3\chi(k)$  vs  $k$  for (a)  $\text{Ru}_5\text{Fe}_5\text{-ZnBTC}$ , (b)  $\text{RuFe@Fe}_2\text{O}_3/\text{mCNF-25\%}$  and (c) Fe foil.

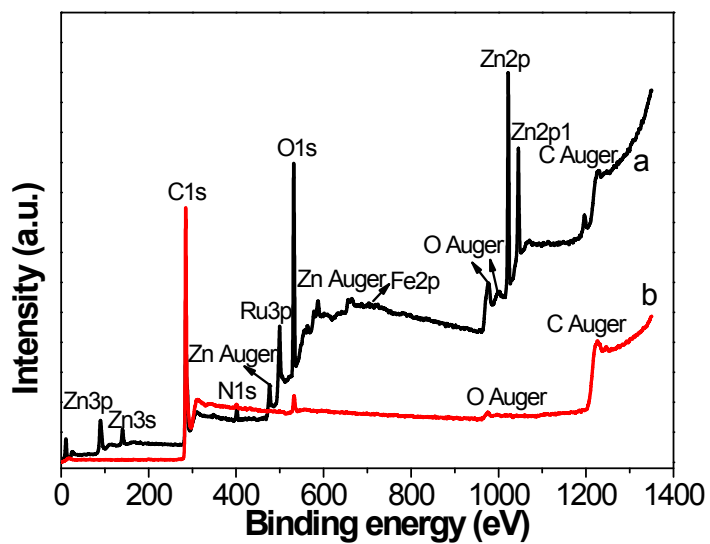

**Fig. S5.** XPS spectra of survey spectrum for (a)  $\text{Ru}_5\text{Fe}_5\text{-ZnBTC}$  and (b)  $\text{RuFe@Fe}_2\text{O}_3/\text{mCNF-25\%}$ .

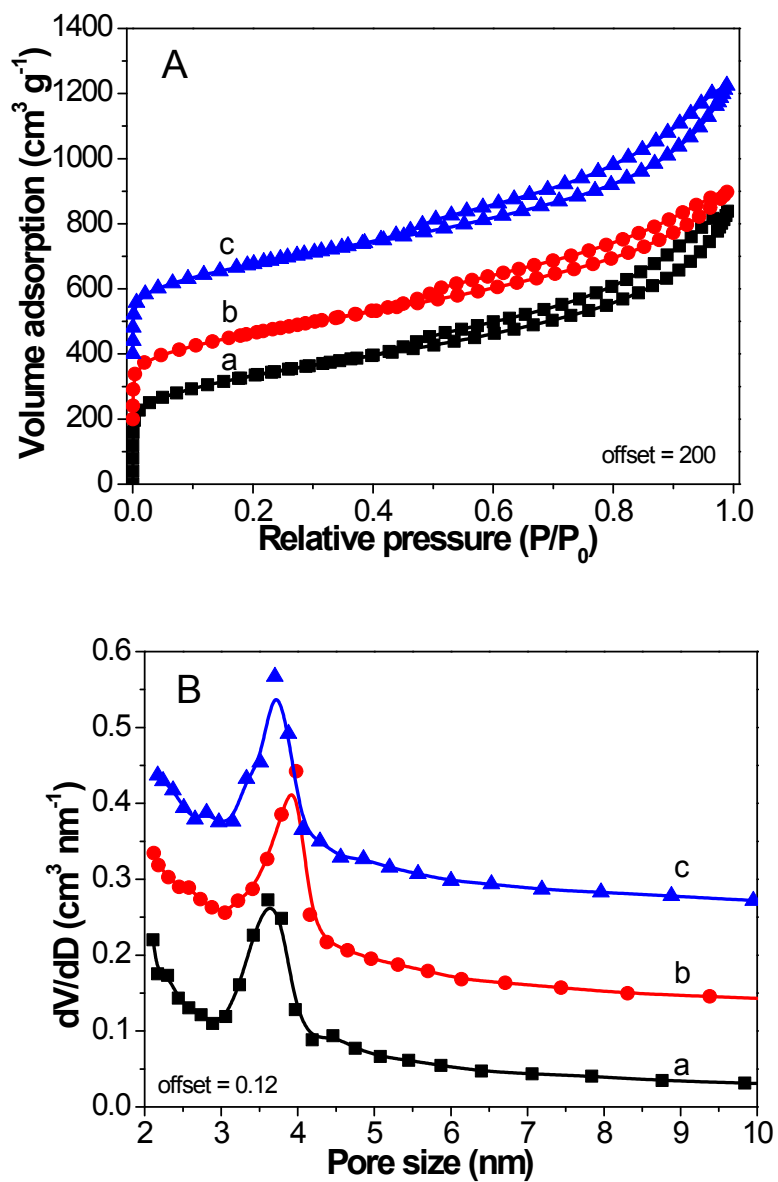

**Fig. S6.** N<sub>2</sub> adsorption/desorption isotherms (A) and the corresponding pore size distribution curves (B) of (a) RuFe@Fe<sub>2</sub>O<sub>3</sub>/mCNF-11%, (b) RuFe@Fe<sub>2</sub>O<sub>3</sub>/mCNF-25% and (c) RuFe@Fe<sub>2</sub>O<sub>3</sub>/mCNF-40%.

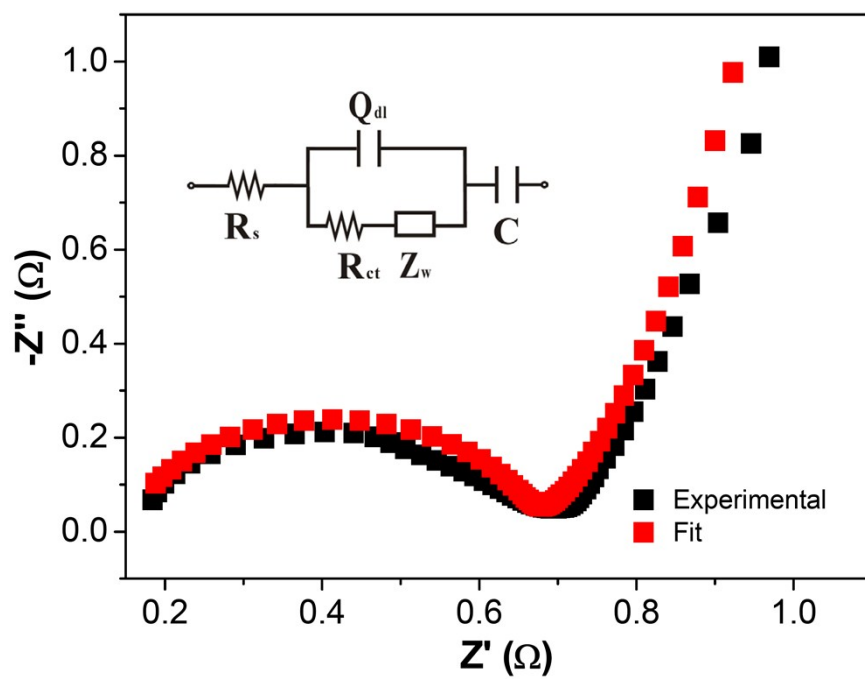

**Fig. S7.** Measured and simulated EIS impedance for RuFe@Fe<sub>2</sub>O<sub>3</sub>/mCNF-25% and the equivalent electrical circuit (inset).
